# Supplementary material for: Molecularly distinct striatonigral neuron subtypes differentially regulate locomotion
Source: Springer Nature journal article supplement (doi:10.1038/s41467-025-58007-x), 2025-03-19
Supplement: MOESM1 [file 41467_2025_58007_MOESM1_ESM.pdf]

**Title: Molecularly Distinct Striatonigral Neuron Subtypes Differentially Regulate Locomotion**

**Authors:** Jie Dong<sup>1</sup>, Lupeng Wang<sup>1</sup>, Breanna T. Sullivan<sup>1</sup>, Lixin Sun<sup>1</sup>, Victor M. Martinez Smith<sup>1</sup>, Lisa Chang<sup>1</sup>, Jinhui Ding<sup>2</sup>, Weidong Le<sup>3,4</sup>, Charles R. Gerfen<sup>5</sup>, and Huaibin Cai<sup>1\*</sup>

**Supplementary Figures and Figure Legends**

**Supplementary Fig. 1. Different expression pattern of *Tshz1* and *Kremen1* in the dorsal striatum**

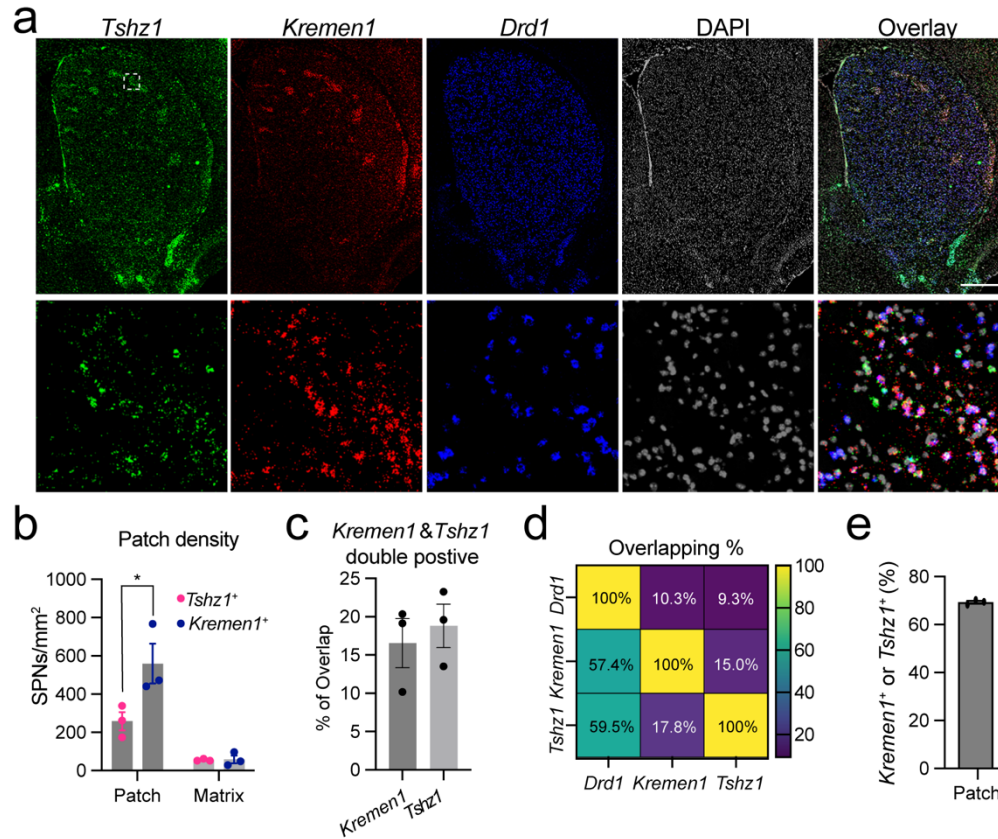

(a) Representative images showing RNAscope labeling for *Tshz1*, *Kremen1*, *Drd1* and DAPI in the striatum. Scale bar: 500  $\mu$ m. High-magnification images of the boxed area in the top panel are shown at the bottom. (b) Comparison of *Tshz1*<sup>+</sup> SPN and *Kremen1*<sup>+</sup> SPN densities in the manually defined patch (*Tshz1*<sup>+</sup>:259.0  $\pm$  47.53 cells / mm<sup>2</sup> vs. *Kremen1*<sup>+</sup>:559.9  $\pm$  103.9 cells / mm<sup>2</sup>) and matrix (*Tshz1*<sup>+</sup>:55.87  $\pm$  3.53 cells / mm<sup>2</sup> vs. *Kremen1*<sup>+</sup>:58.39  $\pm$  20.0 cells / mm<sup>2</sup>) compartments in the dorsal striatum (n = 3 mice). Paired t-test, two-tailed, \*p<0.05. (c) Bar graph illustrating the percentages of double-positive dSPNs for *Kremen1* and *Tshz1* within individual *Kremen1*<sup>+</sup> and *Tshz1*<sup>+</sup> dSPNs. (d) Heatmap displaying the percentages of *Drd1*<sup>+</sup> nuclei positive for *Kremen1* and *Tshz1* (1<sup>st</sup> row), *Kremen1*<sup>+</sup> nuclei positive for *Drd1* and *Tshz1* (2<sup>nd</sup> row), and *Tshz1*<sup>+</sup> nuclei that were positive for *Drd1* and *Kremen1* (3<sup>rd</sup> row) (n = 3 mice). (e) Percentage of *Kremen1*<sup>+</sup> and *Tshz1*<sup>+</sup> SPNs in the manually defined patch compartment. All error bars represent mean  $\pm$  SEM.

## Supplementary Fig. 2. Generation of *Kremen1*<sup>2A-Cre</sup> knock-in mice

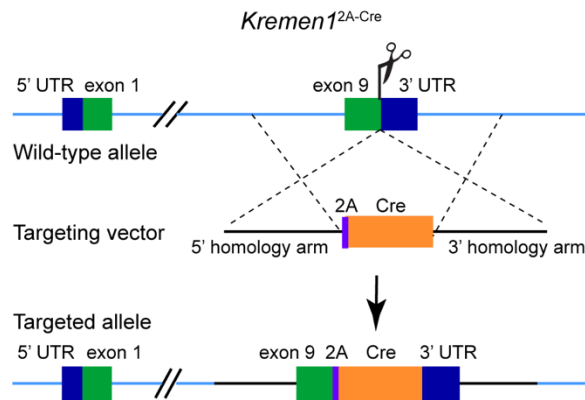

A schematic illustrating the insertion of the 2A-Cre coding sequence upstream of the stop codon in exon 9 of the *Kremen1* gene. A gene-targeting donor plasmid was constructed with a 3.2kb 5' homologous arm and a 2.9kb 3' homologous arm. The gRNA sequence (GTGGGCTTCAGTCACTCACG AGG) was used to guide the precise insertion of 2A-Cre DNA fragment via CRISPR/Cas9-mediated gene targeting.

## Supplementary Fig. 3. Quantification of *Kremen1*<sup>+</sup> cells in the patch and matrix

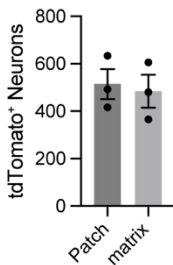

The average number of *Kremen1*<sup>+</sup> SPNs was quantified in the patch (positive for MOR1 immunostaining) and matrix compartments from two representative coronal hemisphere sections across three *Kremen1*<sup>2A-Cre</sup>;Ai14 mice. *Kremen1*<sup>+</sup> SPNs were identified by tdTomato signals with a soma diameter larger than 10  $\mu$ m. Paired t-test, two-tailed,  $p = 0.6324$ . All error bars represent mean  $\pm$  SEM.

**Supplementary Fig. 4. Identification of *Kremen1*<sup>+</sup> cell types in striatum**

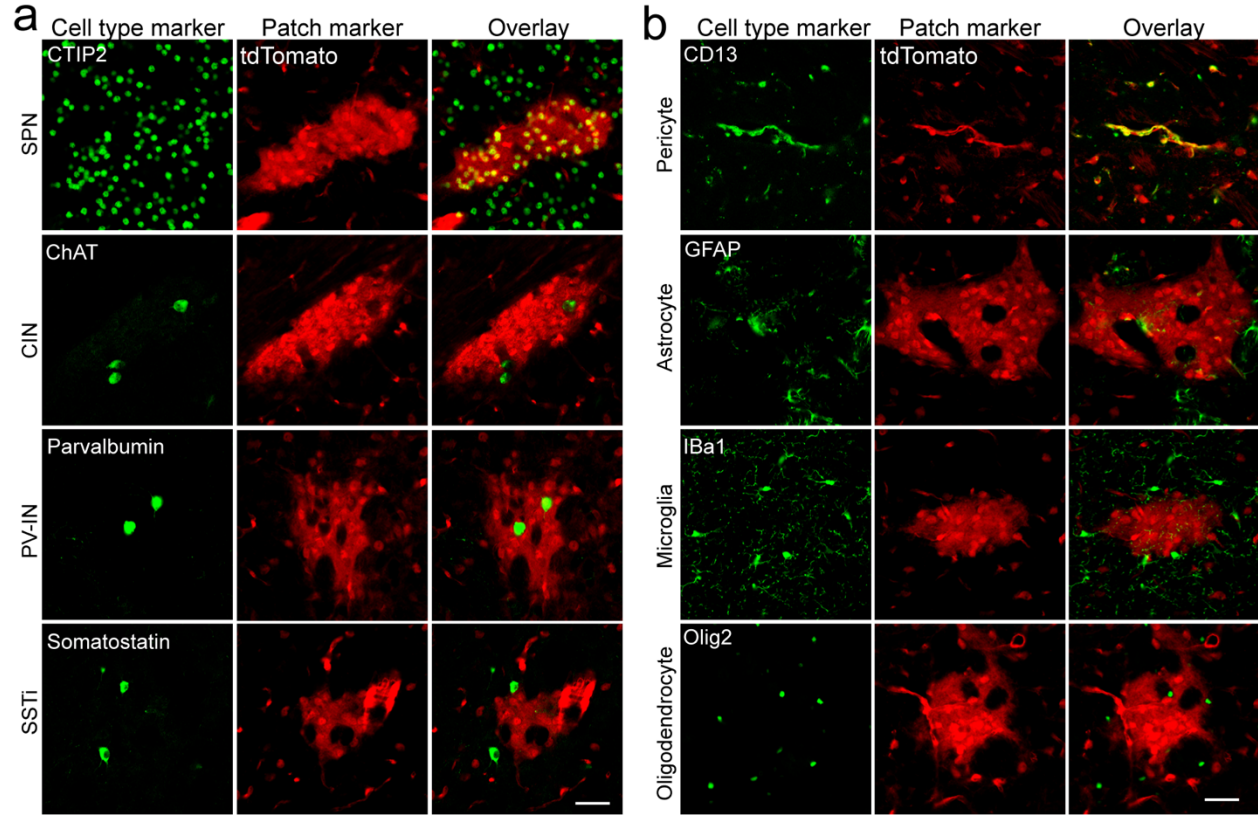

**(a)** Representative images of coronal sections from *Kremen1*<sup>2A-Cre</sup>;Ai14 mice (n>3), co-stained with tdTomato and markers for various striatal neuronal types, including CTIP2 for SPNs, choline acetyltransferase (ChAT) for cholinergic interneurons (CINs), parvalbumin for parvalbumin interneurons (PVs), and somatostatin for somatostatin-expressing interneurons (SSTi). Scale bar: 50  $\mu$ m. **(b)** Representative images of coronal sections from *Kremen1*<sup>2A-Cre</sup>;Ai14 mice (n>3), co-stained with tdTomato and markers for glial and vascular cell types, including CD13 for pericytes, GFAP for astrocytes, IBA1 for microglia, and Olig2 for oligodendrocytes. Scale bar: 50  $\mu$ m.



**Supplementary Fig. 5. Characterization of the distribution and projection pattern of *Kremen1*<sup>+</sup> neurons**

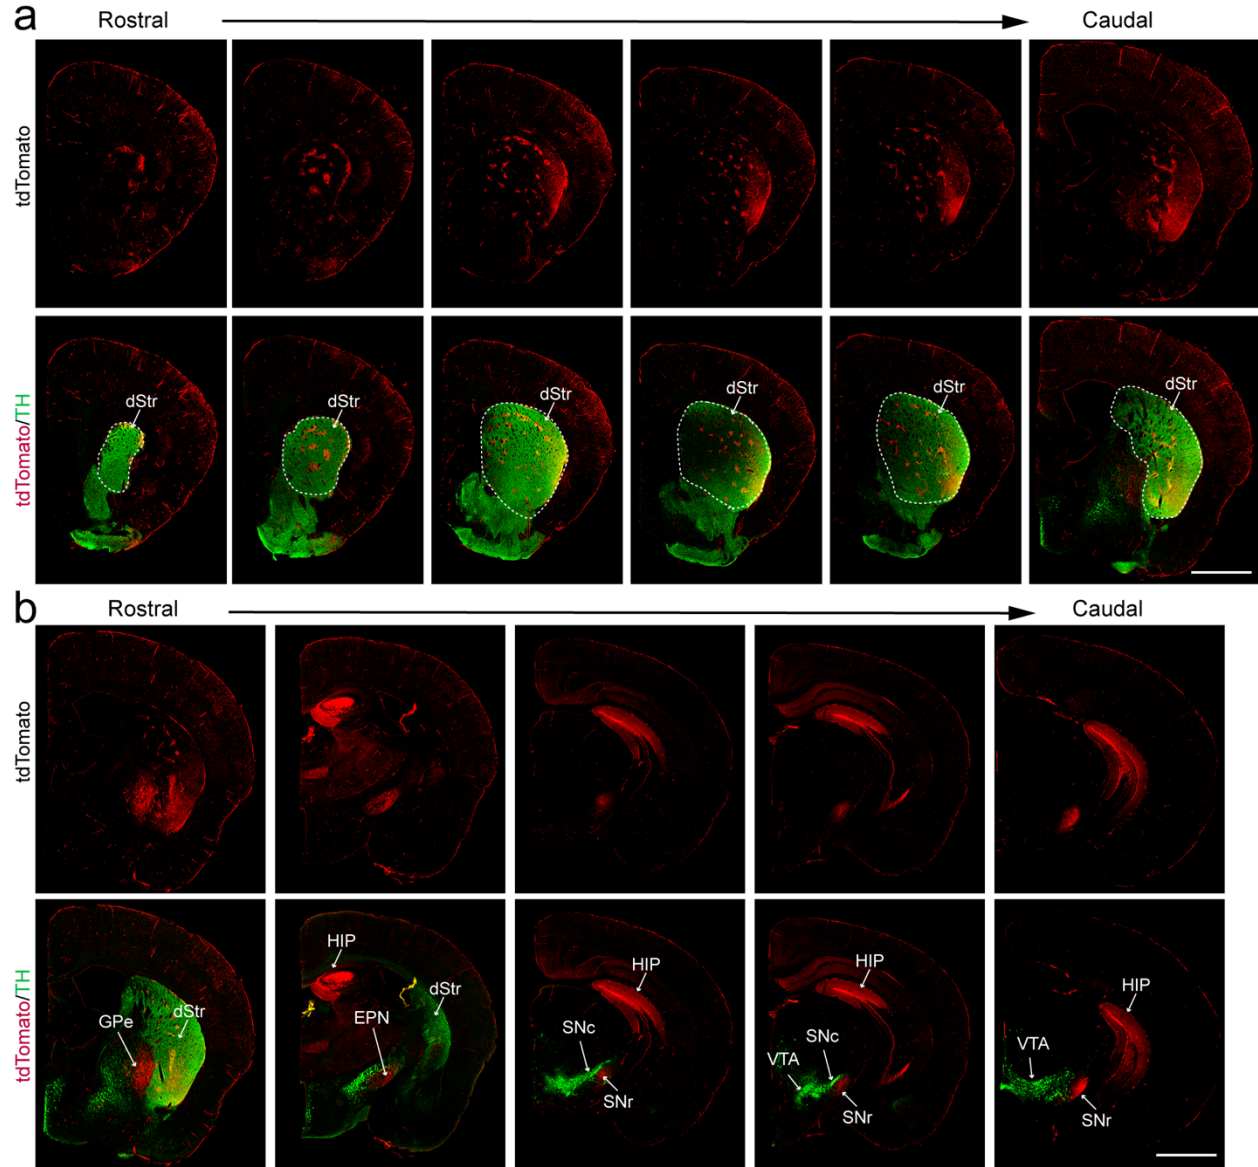

**(a)** Coronal sections from a representative *Kremen1*<sup>2A-Cre</sup>;Ai14 mouse showing the *Kremen1* gene locus-directed tdTomato expression throughout the dorsal striatum. Scale bar: 1mm. **(b)** Coronal sections from a representative mouse showing the *Kremen1* gene locus-directed tdTomato expression in projection nuclei, including GPe, ENP and SN. The tdTomato signals are also detected in the hippocampal (HIP) region. Scale bar: 1mm.

**Supplementary Fig. 6. Characterization of the distribution and projection pattern of *Calb1*<sup>+</sup> SPNs**

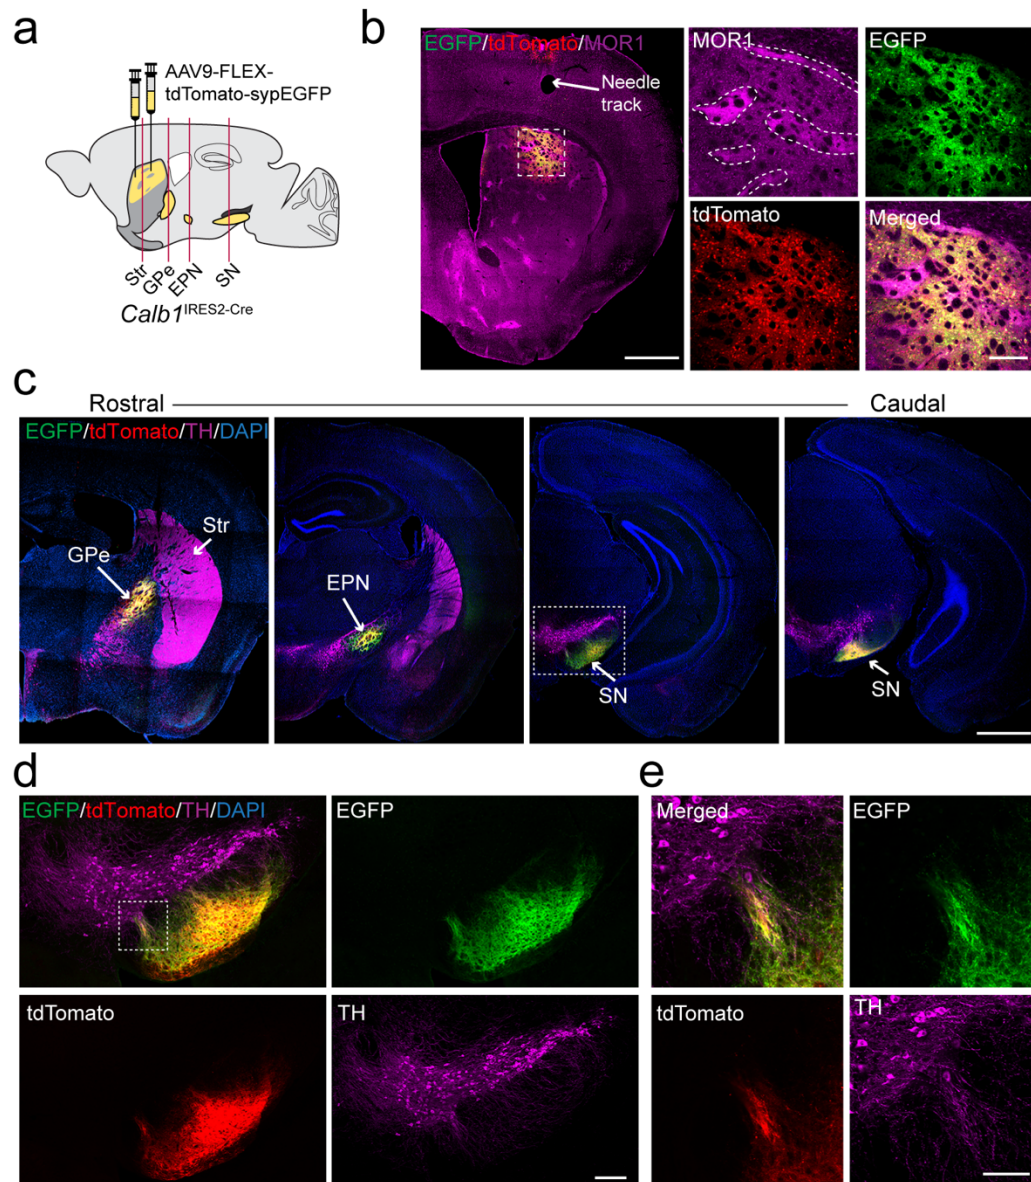

**(a)** Schematics of AAV9-FLEX-tdTomato-sypEGFP injection in the dorsal striatum (dStr) of *Calb1*<sup>ires2-cre</sup> mice. The red vertical lines indicate the location of coronal sections shown in panels **(b)** and **(c)**. **(b)** Representative image of MOR1 (purple), sypEGFP (green) and tdTomato (red) staining in the dStr. The boxed area in the left panel is magnified in the right panels. Scale bars: 500  $\mu$ m in left panel and 100  $\mu$ m in boxed area. **(c)** A series of coronal sections stained for TH (purple), sypEGFP (green), tdTomato (red) and DAPI (blue), illustrating the projections of *Calb1*<sup>+</sup> SPNs to globus pallidus externus (GPe), entopeduncular nucleus (EPN), and substantia nigra (SN). Scale bars: 500  $\mu$ m. **(d)** Representative image of TH (purple), sypEGFP (green), tdTomato (red) staining in the SN. Scale bars: 200  $\mu$ m. **(e)** The boxed area in **(d)** highlights the overlap between the axon terminals of *Calb1*<sup>+</sup> SPNs and the dendrites of TH<sup>+</sup> DANs. Scale bar: 100  $\mu$ m.

# Supplementary Fig. 7. Validation of fiber photometry recording with GCaMP8s

**a**

Optical probe location: *Kremen1*<sup>2A-Cre</sup> mice w/ GCaMP8s

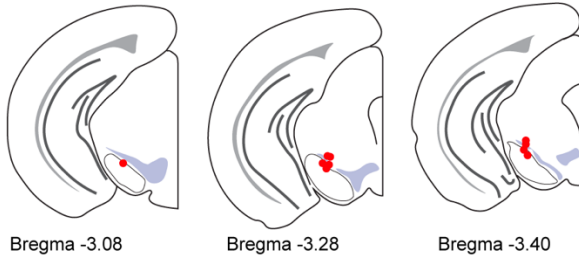

**b**

Optical probe location: *Calb1*<sup>IRES2-Cre</sup> mice w/ GCaMP8s

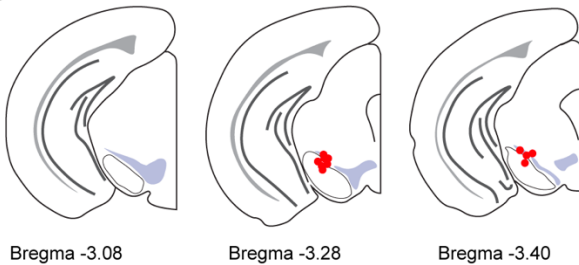

**(a, b)** Schematic diagrams showing fiber tip placements in the SN for *Kremen1*<sup>2A-Cre</sup> **(a)** and *Calb1*<sup>IRES2-Cre</sup> **(b)** mice.

**Supplementary Fig. 8. Locomotion velocity comparison of *Kremen1*<sup>2A-Cre</sup> and *Calb1*<sup>IRES2-Cre</sup> mice**

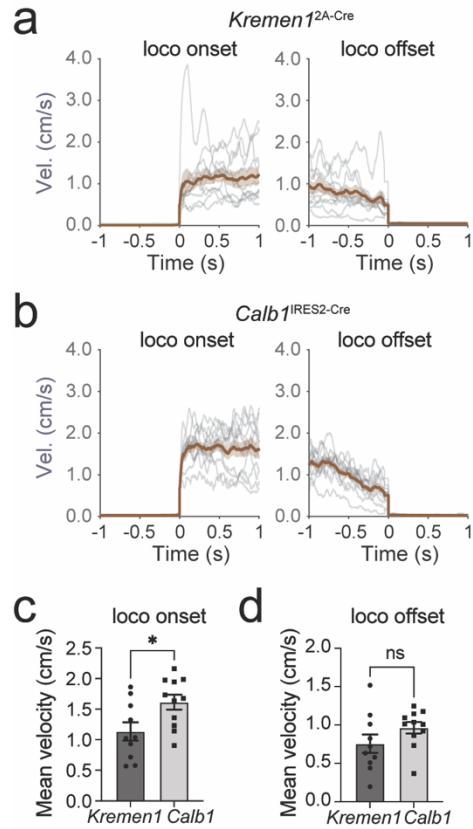

**(a)** Locomotion velocity traces of individual mice (gray) and population mean (brown) aligned on locomotion onset (left) and offset (right) of *Kremen1*<sup>2A-Cre</sup> (n = 10) mice. **(b)** Locomotion velocity traces of individual mice (gray) and population mean (brown) aligned on locomotion onset (left) and offset (right) of *Calb1*<sup>IRES2-Cre</sup> (n = 11) mice. **(c)** Mean velocity comparison between *Kremen1*<sup>2A-Cre</sup> and *Calb1*<sup>IRES2-Cre</sup> mice during locomotion onset. Unpaired t-test, two tailed, \*p = 0.022. **(d)** Mean velocity comparison between *Kremen1*<sup>2A-Cre</sup> and *Calb1*<sup>IRES2-Cre</sup> mice during locomotion offset. Unpaired t-test, two tailed, p = 0.15.

**Supplementary Fig. 9. Optogenetics activation of *Kremen1*<sup>+</sup> and *Calb1*<sup>+</sup> dSPNs at lower intensity or varying frequencies over a short period**

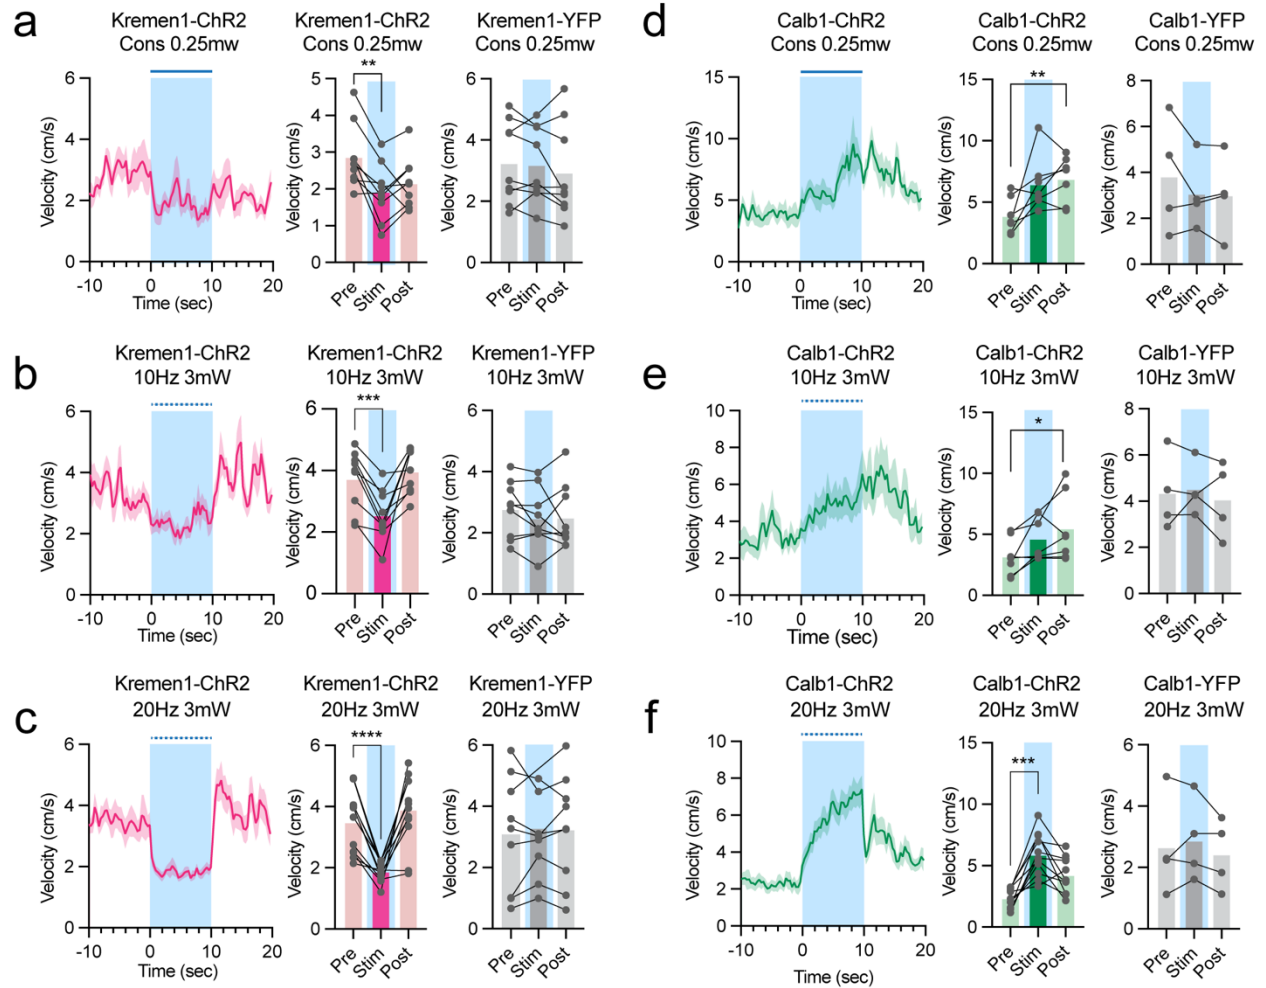

(a-c) Instantaneous velocity aligned to 0.25mW/constant (const, a), 3mW/10Hz (b), and 3mW/20Hz (c) light stimulations for 10s at the SN of Kremen1-ChR2 and Kremen1-YFP mice, respectively. (a) Kremen1-ChR2 mice,  $n = 9$ , repeated measures one-way ANOVA:  $F(1.888, 15.10) = 8.840$ ,  $**p = 0.0032$ . Multiple comparisons test, Pre vs. Stim,  $**p = 0.0072$ . (b) Kremen1-ChR2 mice,  $n = 9$ , repeated measures one-way ANOVA:  $F(1.433, 11.47) = 11.45$ ,  $**p = 0.0033$ . Multiple comparisons test, Pre vs. Stim,  $***p = 0.0008$ ; Stim vs. Post,  $*p = 0.0128$ . (c) Kremen1-ChR2 mice,  $n = 12$ , repeated measures one-way ANOVA:  $F(1.749, 19.23) = 25.33$ ,  $****p < 0.0001$ . Multiple comparisons test, Pre vs. Stim,  $****p < 0.0001$ ; Stim vs. Post,  $***p = 0.0003$ . Optogenetics activation of Kremen1-YFP ( $n = 9$ ) did not significantly change velocity. (d-f) Instantaneous velocity aligned to light stimulation at the SN of Calb1-ChR2 and Calb1-YFP with the same parameters as a-c. (d) Calb1-ChR2 mice,  $n = 7$ , repeated measures one-way ANOVA:  $F(1.325, 7.949) = 8.78$ ,  $*p = 0.0143$ . Multiple comparisons test, Pre vs. Post,  $**p = 0.0091$ . (e) Calb1-ChR2 mice,  $n = 7$ , repeated measures one-way ANOVA:  $F(1.859, 11.15) = 6.565$ ,  $*p = 0.0142$ . Multiple comparisons test, Pre vs. Post,  $*p = 0.03$ . (f) Calb1-ChR2 mice,  $n = 11$ , repeated measures one-way ANOVA:  $F(1.871, 18.71) = 24.08$ ,  $****p < 0.0001$ . Multiple comparisons test, Pre vs. Stim,  $***p = 0.0002$ ; Pre vs. Post,  $**p = 0.0038$ ; Stim vs. Post,  $*p =$



0.0335. Optogenetics activation of Calb1-YFP (n = 4) did not significantly change velocity. All error bars are represented as mean  $\pm$  SEM.

**Supplementary Fig. 10. Characterization of axon projections of *Kremen1*<sup>+</sup> iSPNs**

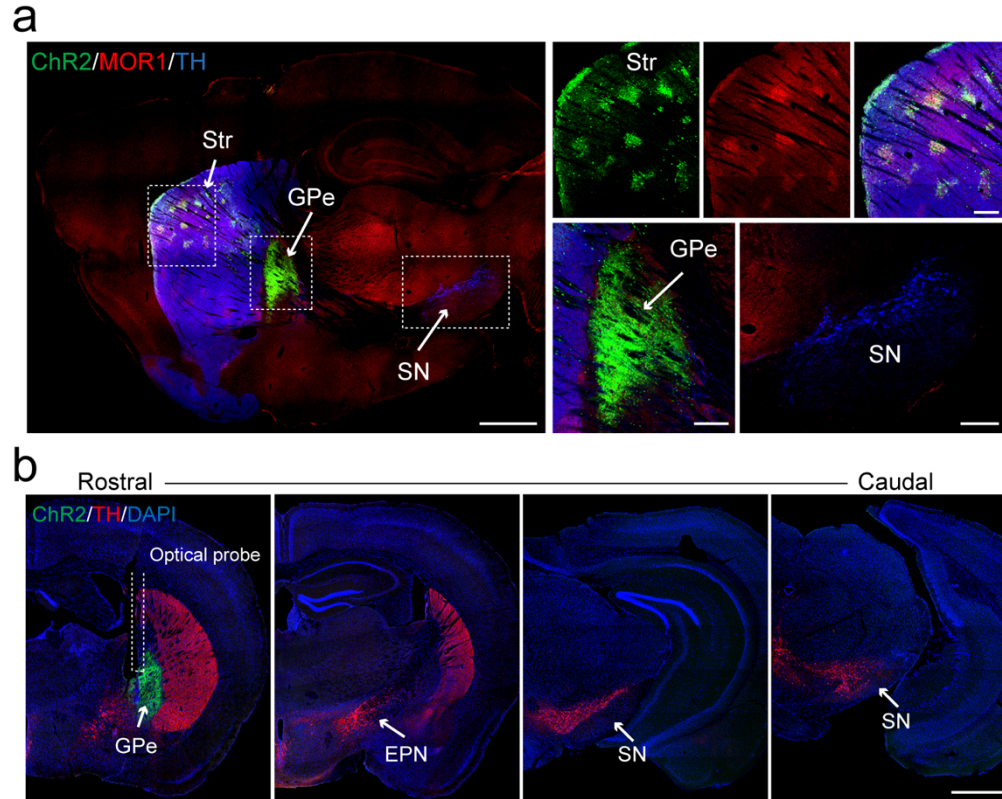

**(a)** Representative sagittal section from a *Kremen1*<sup>2A-Cre</sup>;*A2a*<sup>2A-Flp</sup> double KI mouse injected with AAV1-ConFon-ChR2 in the dorsal striatum (Str), showing that ChR2 (green) expression is concentrated in MOR1 (red)-positive regions. Notably, *Kremen1*<sup>+</sup> iSPNs project exclusively to the GPe. The right panels show high-magnification images of the boxed areas in the left panel, highlighting the dorsal Str, GPe, and SNr. Scale bars: 1mm in whole sagittal image, 200  $\mu$ m in boxed areas. **(b)** A series of coronal images showing ChR2 (green), TH (red), and DAPI (blue) in the GPe, EPN, and SNr. Scale bars: 500  $\mu$ m.

# Supplementary Fig. 11. Chemogenetic activation of *Kremen1*<sup>+</sup> SPNs suppresses locomotion

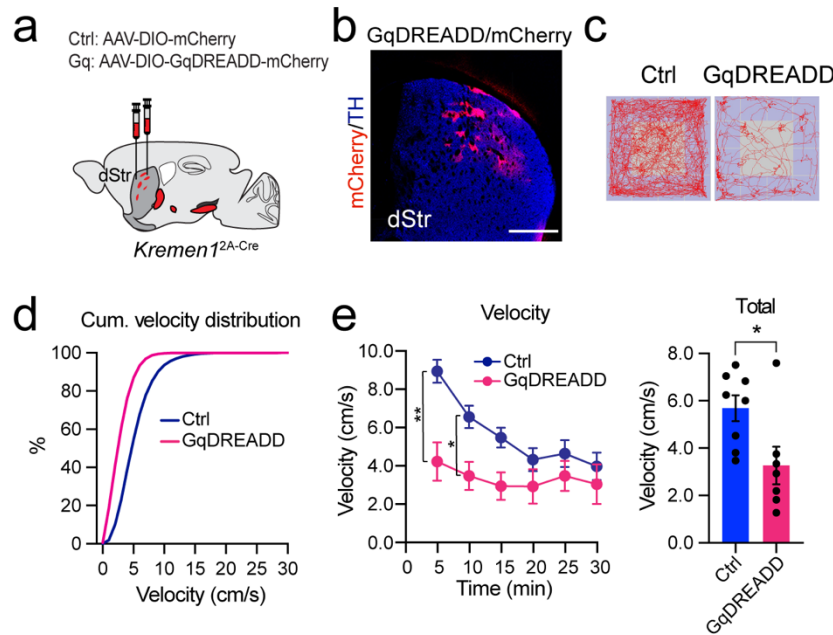

(a) Schematics illustrating the injection of Ctrl or GqDREADD AAV vectors in the dorsal striatum of *Kremen1*<sup>2A-Cre</sup> mice. (b) Representative image showing GqDREADD/mCherry expression in the patch-like structures in the dorsal striatum. Scale bar: 500  $\mu$ m. (c) Tracks from representative Ctrl and GqDREADD mice during the open field test. (d) Cumulative (Cum.) frequency distribution of velocity in Ctrl (n=8 mice) and GqDREADD (n=7 mice) groups. (e) Velocity measurements: (left) velocity change over 5-minute intervals during a 30-minute test period and (right) the average velocity over the entire 30-minute test. In the left panel, two-way ANOVA shows a significant interaction ( $p = 0.0036$ ) with post-hoc analysis indicating a significant difference at specific time points (\* $p = 0.035$ ). In the right panel, the average velocity of the Ctrl group was  $5.68 \pm 0.55$  cm/s, while the GqDREADD group showed a significantly reduced average velocity of  $3.27 \pm 0.79$  cm/s (unpaired t-test, two-tailed,  $p = 0.0238$ ). Data are presented as mean  $\pm$  SEM.



**Supplementary Fig. 12. Activation of *Kremen1*<sup>+</sup> and *Calb1*<sup>+</sup> dSPNs differentially modulates dopamine release during 10Hz optical stimulation**

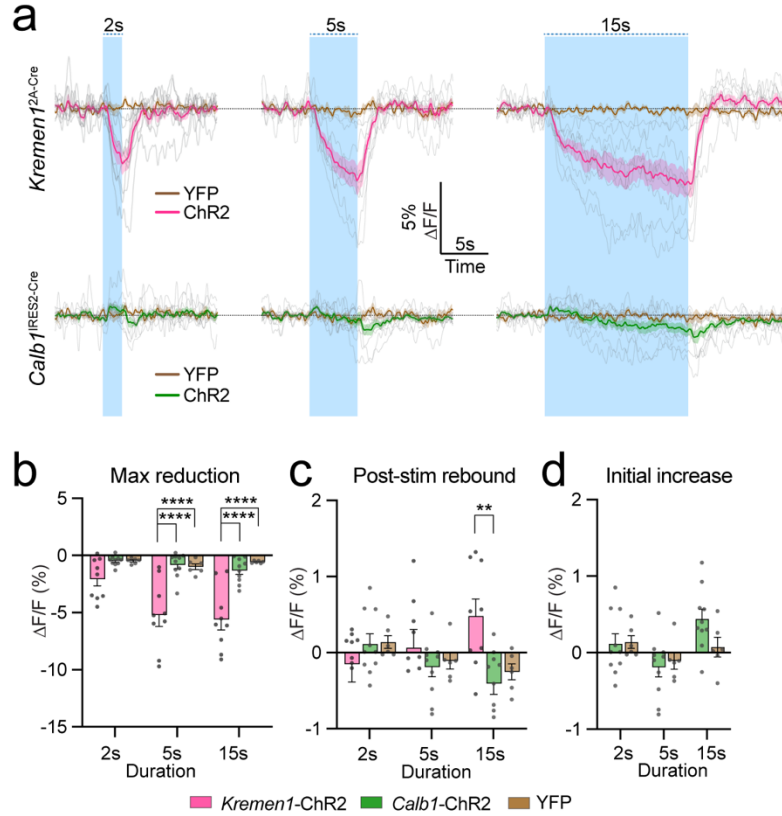

**(a)** Changes in dopamine levels ( $\Delta F/F$ ) in the dStr during 10 Hz light stimulation with varying durations in the SN of *Kremen1*<sup>2A-Cre</sup> (top) and *Calb1*<sup>IRES2-Cre</sup> (bottom) mice, along with YFP control mice. Solid traces with shading represent the population mean  $\pm$  SEM of  $\Delta F/F$  change for each group, aligned to the stimulation onset. Light gray traces show the mean  $\Delta F/F$  change for individual *Kremen1* ChR2 (n = 9 mice) and *Calb1* ChR2 (n = 10 mice) mice. YFP data are from a combination of *Kremen1* YFP (n = 3 mice) and *Calb1* YFP (n = 3 mice). **(b)** The amplitude of maximum dopamine release reduction following activation of *Kremen1*<sup>+</sup> (red) and *Calb1*<sup>+</sup> (green) dSPN axons and their YFP (brown) controls, as shown in panel (a). Two-way ANOVA revealed an effect of dSPN activation ( $F(2,66) = 38.18$ , \*\*\*\*  $p < 0.0001$ ), stimulation duration ( $F(2,66) = 5.781$ , \*\*  $p = 0.0049$ ), and an interaction between the two factors ( $F(4,66) = 3.006$ , \*  $p = 0.0243$ ). Multiple comparisons showed significant differences between *Kremen1* ChR2, *Calb1* ChR2, and YFP groups (two-tailed, \*\*\*\*  $p < 0.0001$ ). **(c)** Post-stimulation dopamine release changes after activation of *Kremen1*<sup>+</sup> and *Calb1*<sup>+</sup> dSPN axons, as shown in panel (a). Two-way ANOVA indicated an effect of dSPN activation ( $F(2,66) = 2.338$ ,  $p = 0.1045$ ), stimulation duration ( $F(2,66) = 0.3171$ ,  $p = 0.7294$ ), and an interaction effect ( $F(4,66) = 3.350$ , \*  $p = 0.0147$ ). Multiple comparisons revealed significant differences in dopamine rebound amplitude between *Kremen1* ChR2, *Calb1* ChR2, and YFP groups (two-tailed, \*\*  $p < 0.01$ ). **(d)** The amplitude of initial dopamine release elevation after stimulating *Calb1* ChR2 or YFP mice. Two-way ANOVA showed no significant effect of *Calb1*<sup>+</sup> dSPN activation ( $F(1,42) = 0.6427$ ,  $p = 0.4272$ ), but a significant effect of stimulation duration ( $F(2,42) = 4.857$ , \*  $p = 0.0127$ ). No

significant differences were observed between *Calb1* Chr2 and YFP groups in the multiple comparison test. All data in this figure are presented as mean  $\pm$  SEM.

**Supplementary Fig. 13. Expression of Gabbr1 mRNA and protein in DANs and pericytes**

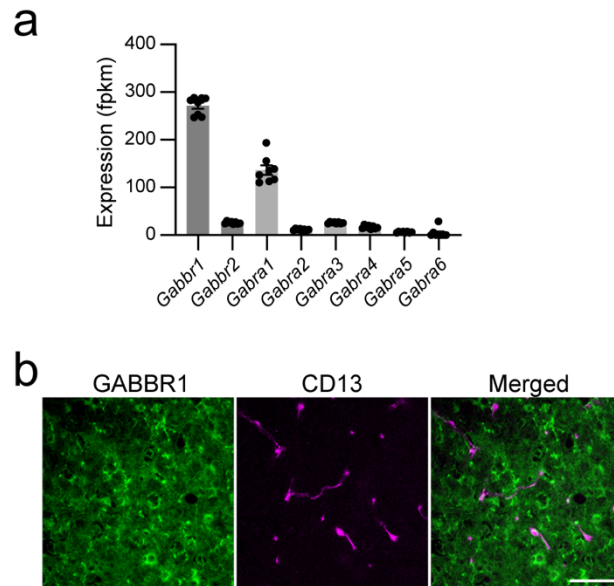

(a) Normalized expression of different GABA-B and GABA-A receptor encoding transcripts in the DANs isolated by laser capture microdissection from SNc (plotted from PRJNA775656). (b) Representative images showing GABBR1 receptor (green) and pericyte marker CD13 (magenta) staining in the SN of a Ctrl mouse. No detectable GABBR1 expression in the pericytes. Scale bar: 50  $\mu$ m.

**Supplementary Fig. 14. Expression of HA-tagged saCas9 in *Aldh1a1*<sup>+</sup> DANs**

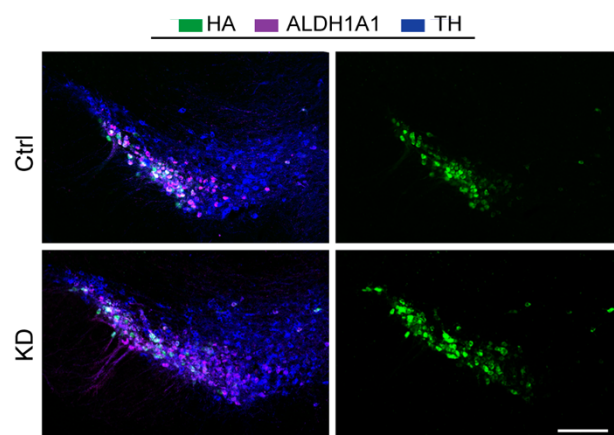

Representative image showing HA (green), ALDH1A1 (magenta), and TH (blue) staining in the SNc of Ctrl and *Gabbr1*-KD mice. Scale bar: 500  $\mu$ m.

**Supplementary Fig. 15. Cre-off ChR2 expression in the dorsal striatum**

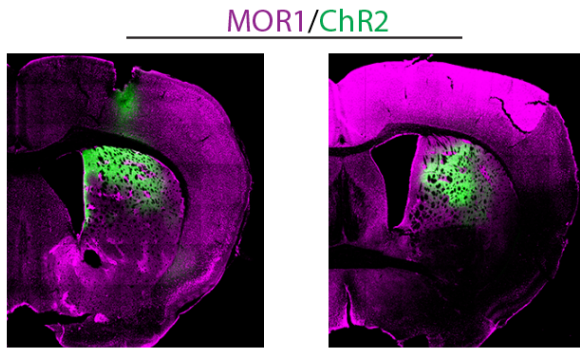

Two sequential images showing the expression of Cre-off ChR2 (green) in the matrix compartments, which are devoid MOR1 expression (magenta).

**Supplementary Fig. 16. Individual traces of *Aldh1a1*<sup>+</sup> DAN activity during *Kremen1*<sup>+</sup> dSPN activation under *Gabbr1* Knockdown condition**

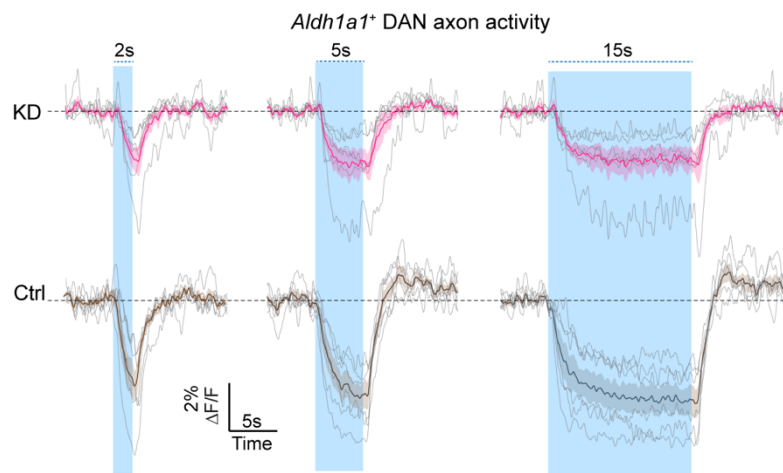

Individual traces of *Alzh1a1*<sup>+</sup> DAN axonal GCaMP8s activity in the dorsal striatum during 20 Hz light stimulation of varying durations (adapted from **Fig. 10c**). Traces from Gabbr1 knockdown (KD) mice (N = 6, top) and control (Ctrl) mice (N = 6, bottom) are shown in light gray. Group-averaged responses (solid line)  $\pm$  SEM (shaded area) provide context.
